# Supplementary material
Source: publisher site journal article supplement (https://www.dovepress.com/article/284471)
Supplement: Supplementary file 1 [file get_supplementary_file.php]

**Revised Supplementary Material**

**Repurposing FDA approved drugs as JNK3 inhibitor for prevention of neuroinflammation induced by MCAO in rats**

Zikra Zulfiqar1, Fawad Ali Shah1#, Shagufta Shafique2, Abdullah Alattar3, Tahir Ali4, Arooj Mohsin Alvi1. Sajid Rashid2, Shupeng Li5#

*Corresponding author

Dr. Fawad Ali Shah and Dr. Shupeng Li


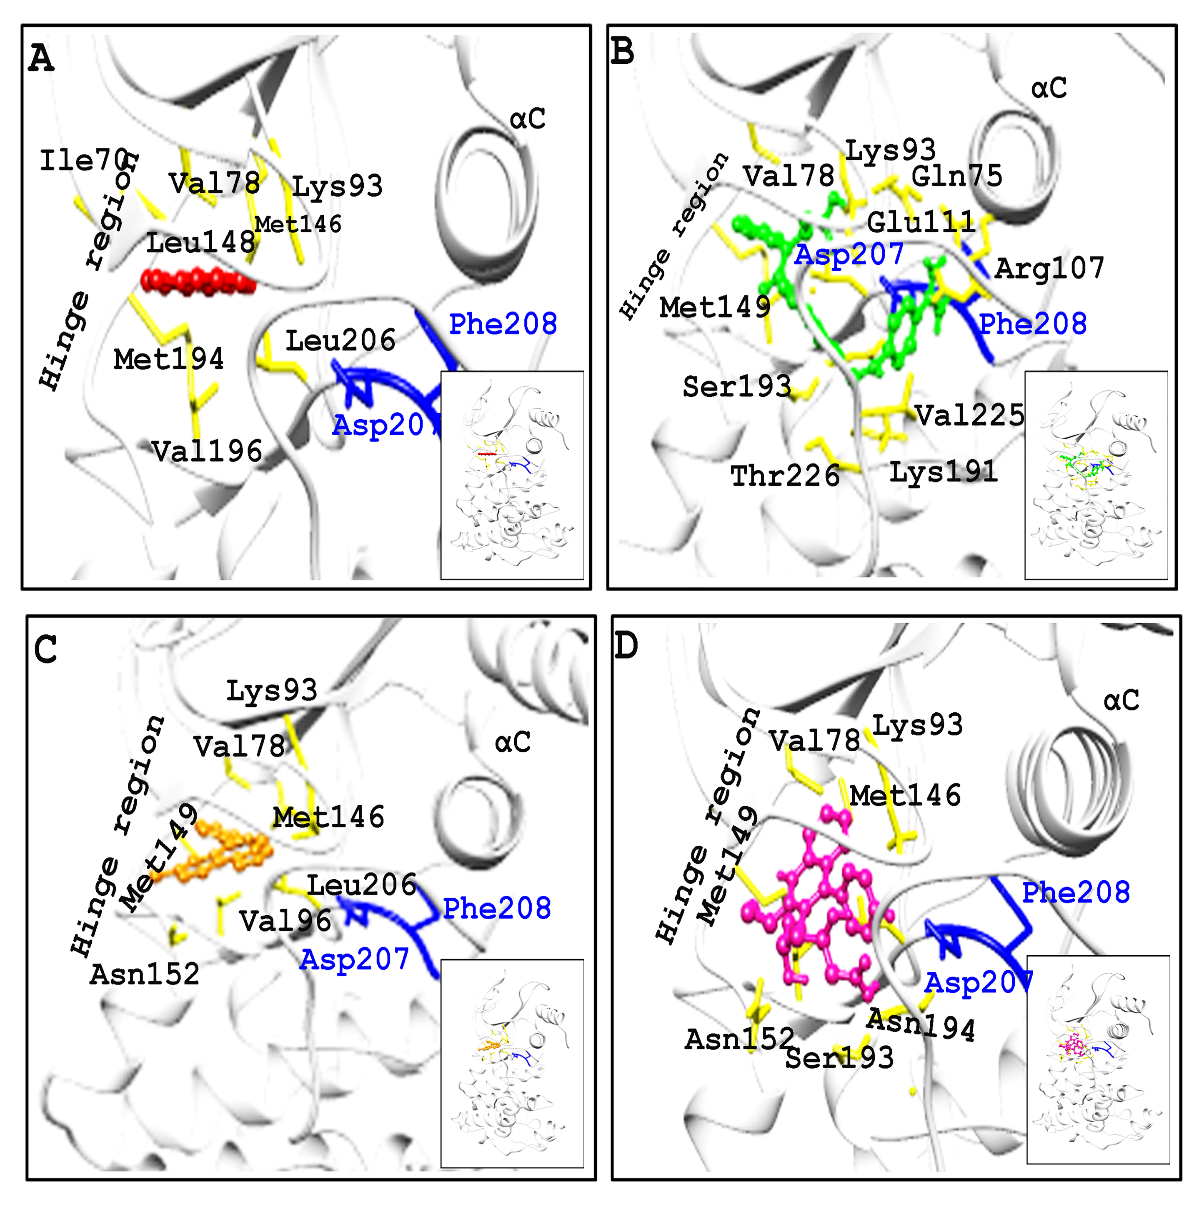


**Figure S1**

**Supplementary** **figure and figure legend**

**Figure S1: Binding modes of JNK3 inhibitors**. SP600215 (A, red), dabigatran (B, green), estazolam (C, orange), and pitavastatin (D, pink). These inhibitors exhibited binding at the ATP binding site of JNK3 in a DFG-out conformation, they contain Type II binding mode.
